# Supplementary material for: Usefulness of Novel Atherogenic Lipid Indices for the Evaluation of Metabolic Status Leading to Coronary Heart Disease in a Real-World Survey of the Japanese Population
Source: MDPI journal article supplement (doi:10.3390/healthcare10040747), 2022-04-17
Supplement: s1 [file s1]

## Supplementary Materials

Figure S1

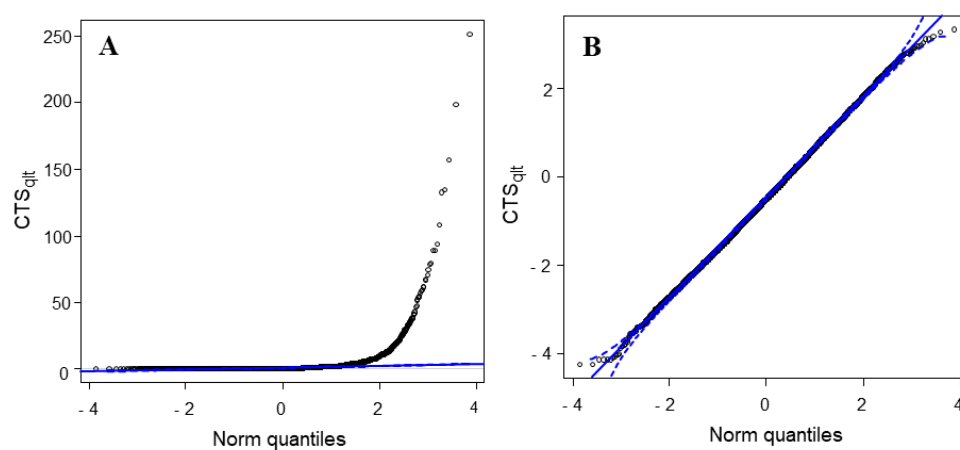

**Figure S1.** The Q-Q plots for the CTS<sub>qIt</sub> index before (A) and after (B) the Box-Cox transformation. The  $\lambda$  value is  $-0.2$ .

**Figure S2**

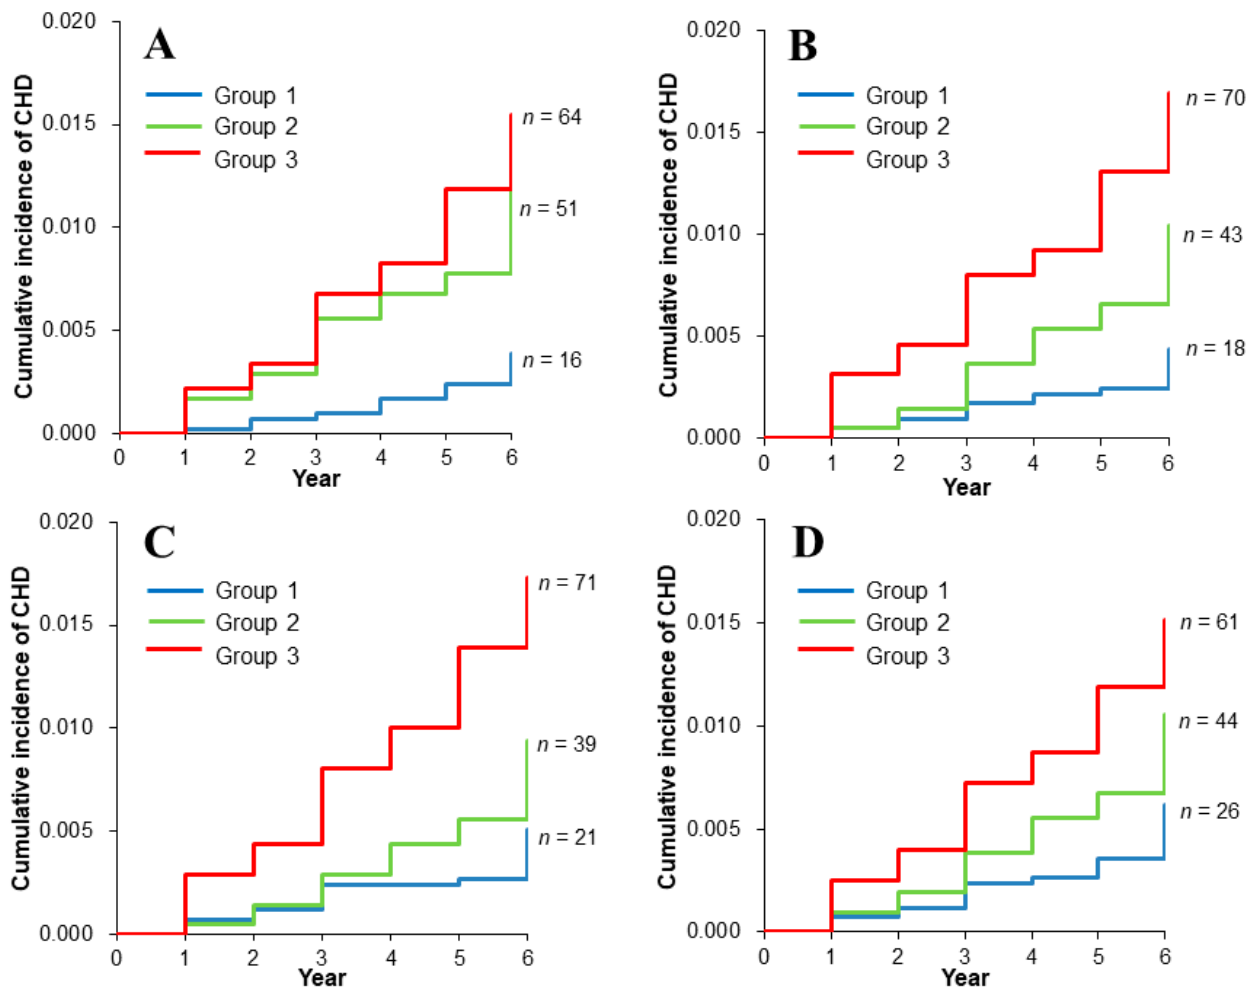

**Figure S2.** Kaplan-Meier curves of cumulative CHD incidence in the groups of CTS<sub>q1t</sub> (A), TG/HDL-c (B), CTS<sub>qnt</sub> (C), and nonHDL-c (D). The study population is divided by 33.3 and 66.6 percentiles of each index. Groups 1, 2, and 3 are shown as blue, green, and red lines, respectively. .

**Table S1.** Categories of blood pressure and blood glucose levels.

| Factors                        | Variables                        | Category |         |      |
|--------------------------------|----------------------------------|----------|---------|------|
|                                |                                  | L        | M       | H    |
| Blood pressure <sup>*1</sup>   | Systolic (mmHg)                  | –139     | 140–159 | 160– |
|                                | Diastolic (mmHg)                 | –89      | 90–99   | 100– |
| Blood sugar (BS) <sup>*2</sup> | Fasting BS (mg/dL) <sup>*3</sup> | –109     | 110–125 | 126– |
|                                | HbA1c (%)                        | –6.0     | 6.1–6.4 | 6.5– |

<sup>\*1</sup>, Higher category of systolic or diastolic blood pressure in each subject is chosen for regression analyses.

<sup>\*2</sup>, Higher category of fasting blood glucose or HbA1c level is chosen in each subject for regression analyses.

<sup>\*3</sup>, Fasting for more than 10 hours.
